# Supplementary material
Source: publisher figshare collection journal article supplement (https://tandf.figshare.com/articles/dataset/_/22677155)
Supplement: Supplementary file 1 [file 1]

Supplemental online material

**Genetic analyses of chr11p15.5 region identify *MUC5AC*-*MUC5B* associated with asthma-related phenotypes**

Xingnan Li, PhD1,Huashi Li, MS1, Stephanie A. Christenson, MD2, Mario Castro, MD3, Loren C. Denlinger, MD4, Serpil C. Erzurum, MD5, John V. Fahy, MD2, Benjamin M. Gaston, MD6, Elliot Israel, MD7, Nizar N. Jarjour, MD4, Bruce D. Levy, MD7, David T Mauger, PhD8, Wendy C. Moore, MD9, Joe Zein, MD5, Naftali Kaminski, MD10, Sally E. Wenzel, MD11, Prescott G. Woodruff, MD2, Eugene R. Bleecker, MD1, and Deborah A. Meyers, PhD1, for the NHLBI Severe Asthma Research Program (SARP)

1Division of Genetics, Genomics and Precision Medicine, Department of Medicine, University of Arizona, Tucson, Arizona, USA, 2Division of Pulmonary, Critical Care, Sleep and Allergy, Department of Medicine, University of California at San Francisco, San Francisco, California, USA, 3Division of Pulmonary, Critical Care and Sleep Medicine, University of Kansas School of Medicine, Kansas City, Kansas, USA, 4Department of Medicine, University of Wisconsin School of Medicine & Public Health, Madison, Wisconsin, USA, 5Lerner Research Institute and the Respiratory Institute, Cleveland Clinic, Cleveland, Ohio, USA, 6Wells Center for Pediatric Research and Riley Hospital for Children, Indiana University, Indianapolis, Indiana, USA, 7Division of Pulmonary and Critical Care Medicine, Brigham and Women’s Hospital and Harvard Medical School, Boston, Massachusetts, USA, 8Department of Public Health Sciences, College of Medicine, Penn State University, Hershey, Pennsylvania, USA, 9Department of Medicine, Wake Forest School of Medicine, Winston-Salem, North Carolina, USA, 10Division of Pulmonary, Critical Care and Sleep Medicine, Department of Internal Medicine, Yale School of Medicine, New Haven, Connecticut, USA, and 11Department of Environmental and Occupational Health, University of Pittsburgh, Pittsburgh, Pennsylvania, USA

**Correspondence:**

Xingnan Li, PhD, MS

Division of Genetics, Genomics and Precision Medicine

Department of Medicine

University of Arizona College of Medicine

1230 N Cherry Avenue

PO Box 210242

Tucson, AZ 85719

Telephone: 520-626-2905

Fax: 520-626-1894

Email: [lixingnan1@deptofmed.arizona.edu](mailto:lixingnan1@deptofmed.arizona.edu) or [lixingnan1@yahoo.com](mailto:lixingnan1@yahoo.com)

**TOPMed Acknowledgements**

Molecular data for the Trans-Omics in Precision Medicine (TOPMed) program was supported by the National Heart, Lung and Blood Institute (NHLBI). Genome sequencing for “NHLBI TOPMed: Severe Asthma Research Program” (phs001446) was performed at the New York Genome Center (HHSN268201500016C). Core support including centralized genomic read mapping and genotype calling, along with variant quality metrics and filtering were provided by the TOPMed Informatics Research Center (3R01HL-117626-02S1; contract HHSN268201800002I). Core support including phenotype harmonization, data management, sample-identity QC, and general program coordination were provided by the TOPMed Data Coordinating Center (R01HL-120393; U01HL-120393; contract HHSN268201800001I). We gratefully acknowledge the studies and participants who provided biological samples and data for TOPMed.

**Figure Legends**

**Figure S1.** Six candidate genes in chr11p15.5 region based on UCSC Genome Browser Human Dec. 2013 GRCh38/hg38 Assembly (genome.ucsc.edu) [1].

**Figure S2**. Linkage disequilibrium (LD) plot of 26 candidate SNPs in chr11p15.5 region based on 1,016 SARP non-Hispanic Whites. r2 color scheme was used and labeled. 95% CIs on D’ were used to set up blocks [2].

**Table S1.** Demographics (mean ± SD) of participants in SARP [3].

|  | RNA-Seq in BEC  (Longitudinal Cohort) | | Microarray in BEC  (Cross-Sectional Cohort) | SARP WGS | | |
| --- | --- | --- | --- | --- | --- | --- |
| All | WGS | All | Severe Asthma* | Non-Severe Asthma* | Non-Hispanic White |
| n | 156 | 114 | 155 | 426 | 531 | 1,016 |
| Age at enrollment, years | 41 ± 13 | 41 ± 13 | 37 ± 13 | 46 ± 15 | 37 ± 15 | 39 ± 17 |
| Female, n (%) | 99 (63) | 74 (65) | 101 (65) | 269 (63) | 353 (66) | 656 (65) |
| Body mass index, kg/m2 | 30 ± 8.1 | 30 ± 8.7 | 30 ± 6.8 | 31 ± 7.7 | 28 ± 7.6 | 29 ± 7.9 |
| Race†, % | 67/24/9 | 65/26/9 | 62/29/9 | 100/0/0 | 100/0/0 | 100/0/0 |
| Baseline pre-BD FEV1 % predicted | 82 ± 21 | 76 ± 20 | 76 ± 22 | 66 ± 22 | 84 ± 17 | 77 ± 21 |
| Baseline pre-BD FEV1/FVC | 0.73 ± 0.10 | 0.70 ± 0.10 | 0.72 ± 0.12 | 0.66 ± 0.13 | 0.75 ± 0.09 | 0.72 ± 0.12 |
| Asthma status‡, n | 42/52/62 | 0/52/62 | 27/78/50 | 0/0/426 | 0/531/0 | 0/564/451 |

Definition of abbreviations: BEC=bronchial epithelial cells; pre-BD=pre-bronchodilator; RNA-Seq=RNA sequencing; SARP=Severe Asthma Research Program; WGS=whole-genome sequence.

*Severe asthma or non-severe asthma was defined on the basis of the ATS-ERS (American Thoracic Society-European Respiratory Society) criteria [4].

†Race: percentage of non-Hispanic White/African American/other races were presented.

‡Asthma status: numbers of non-asthma participants/patients with non-severe asthma/patients with severe asthma were presented.

**Table S2.** Correlation of mRNA expression levels of six candidate genes in chr11p15.5 region and gene expression biomarkers (Th1, Th2, Th17, and inflammation) in bronchial epithelial cells in SARP.

|  | SARP Longitudinal Cohort RNA-Seq (n = 156): rho (*P* value)* | | | | | |
| --- | --- | --- | --- | --- | --- | --- |
| *AP2A2* | *MUC6* | *MUC2*† | *MUC5AC* | *MUC5B* | *TOLLIP* |
| *POSTN* |  |  |  | 0.46 (2.9x10-9) | -0.45 (6.7x10-9) |  |
| *IL12A* | -0.19 (0.02) |  |  | -0.47 (1.1x10-9) | 0.25 (1.6x10-3) | -0.24 (2.6x10-3) |
| *IL6* |  |  |  | -0.36 (3.6x10-6) | 0.25 (1.9x10-3) |  |
|  | SARP Cross-Sectional Cohort Microarray mRNA (n = 155): rho (*P* value)* | | | | | |
| *AP2A2* | *MUC6* | *MUC2* | *MUC5AC* | *MUC5B* | *TOLLIP* |
| *IL13* |  |  | 0.18 (0.02) | 0.22 (7.2x10-3) | -0.33 (2.2x10-5) |  |
| *POSTN* |  | 0.19 (0.02) | 0.31 (6.8x10-5) | 0.46 (1.6x10-9) | -0.58 (1.7x10-15) |  |
| *IL12A* | -0.22 (6.9x10-3) | -0.29 (3.1x10-4) | -0.22 (5.1x10-3) | -0.24 (2.8x10-3) | 0.28 (5.3x10-4) |  |
| *IL17A* |  | 0.34 (1.3x10-5) |  |  |  |  |
| *IL6* |  |  |  | -0.27 (7.2x10-4) | 0.22 (4.9x10-3) |  |

Definition of abbreviations: RNA-Seq=RNA sequencing; SARP=Severe Asthma Research Program.

*Spearman correlation was performed between the mRNA expression levels of six candidate genes and five biomarkers. Correlation coefficient (rho) and *P* value were shown when *P*<0.05 and labeled in red color when significant after Bonferroni adjustment (*P*<0.05/30=0.0017).

†RNA-Seq of *MUC2*, *IL13*, and *IL17A* failed quality control and thus not reported in the longitudinal cohort.

**REFERENCES**

1. Kent WJ, Sugnet CW, Furey TS, Roskin KM, Pringle TH, Zahler AM, et al. The human genome browser at UCSC. *Genome Res* 2002;**12**:996-1006.

2. Barrett JC, Fry B, Maller J, Daly MJ. Haploview: analysis and visualization of LD and haplotype maps. *Bioinformatics* 2005;**21**:263-265.

3. Li X, Christenson SA, Modena B, Li H, Busse WW, Castro M, et al. Genetic analyses identify GSDMB associated with asthma severity, exacerbations, and antiviral pathways. *J Allergy Clin Immunol* 2021;**147**:894-909.

4. Chung KF, Wenzel SE, Brozek JL, Bush A, Castro M, Sterk PJ, et al. International ERS/ATS guidelines on definition, evaluation and treatment of severe asthma. Eur Respir J 2014;43:343-373.
